# Supplementary material for: A novel Cre-enabled tetracycline-inducible transgenic system for tissue-specific cytokine expression in the zebrafish: CETI-PIC3
Source: PubMed Central journal article supplement (PMC7328138; doi:10.1242/dmm.042556), 2020-06-26
Supplement: dmm-13-042556-s1.pdf [file dmm-13-042556-s1.pdf]

Supplementary Materials

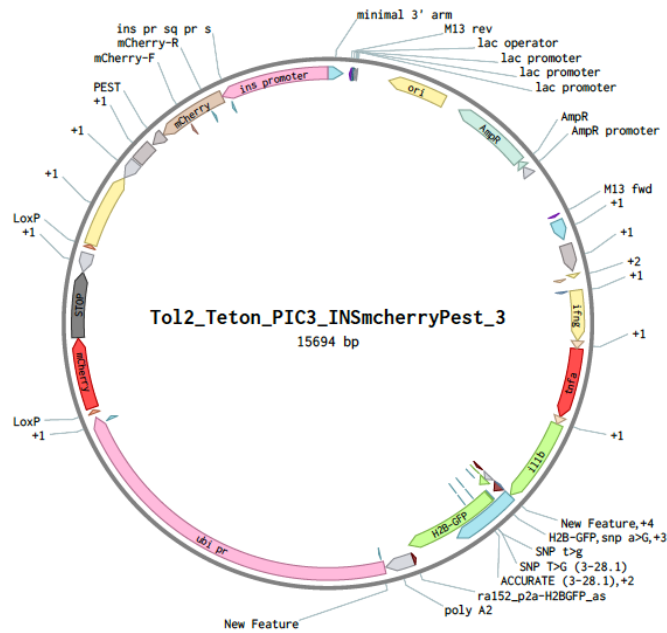

atggattcctgcctcaaaatggtgctactctgtggacttttgggatagcatctctcagacaaccagcgcatacagatttcgacgggccaggagcgagaac  
 ccgattctgaacacaataatcgagaaactaaaacacattataacacgcttgcaaaaggattgggttgaaaatctgtgttttctcatctggaccagctga  
 attctaagccaacctgcacttgccaggctgtgttctgaaggaatctgagcatctatgaagacatttccaagacatgatgaacaagtcagataataaag  
 aagtgagagacgatcttaaaaaagtaattcatgaggtgaaaaattgaagcacaagtacacgaagaacataaattatggaggagctccaggatattca  
 ctcagtcaggcgaaaaatggaacaatccaagaaagagcattaaatgacttctgaaaggtgtattatcgggctccacagaaaaacggcatttacatg  
**GGAGGAGGACAGTGTACTAATTATGCTCTCTTGAAATTGGCTGGAGATGTTGAGAGCAACCC**  
**AGGTCCCGGAGGAGGA**atgaagcttgagagtcgggcgcttttgatgtgagaaggagagtgcccttaccgctggatggtgtctagg  
 aggaagctggatctcaaatcggtgtatggagggtgttggatcatttggctgtggcctttgcccgtctgcccgtctgcttcaagcgcataaga  
 cccagggaatcaacaagatggaagtgtctgagactcacattgagagatgcatttcaaggcaatttcaactccaaggctgcatcatttaacaggt  
 ggatacaactctaatcaagacctagactggagagatgaccaggaccgcttttctcagtggtgctgaaatagtaaacaggagattatcattccc  
 gatgatggcatttatttctacagccagggtgctttgcaatcagctgcagctctgaactgactgaggaacaagtgcctatgagccatgcagtgatgcctt  
 ttctgaatcctacggaggcaaaaagccactttcagtgcaatccgctcaatctgcacgcaggagcctgaaatctgaaatctgtgtacaactatttacctc  
 ggcgctgcttccatttacgagaaggagacagactggcagacacgaccacagcatttaccgatggtgaaaatgataacggaagaccttcttgg  
 ggtgtttggtttg**GGAGGAGGACAGTGTACTAATTATGCTCTCTTGAAATTGGCTGGAGATGTTGAG**  
**AGCAACCCAGGTCCCGGAGGAGGA**atgagaaagcagaggaacttaaccagctctgaaatgatggcatcggggcaatatgaagt  
 caccatagctcaaaaaatftgtggagacagacgggtgctgtttattcagattctgatgagatggactgtcagatccgcttgaatgagctacagatgcga  
 catgcatgagggcatcaggctggagatgtggacttcgcagcacaatgaagcagttgtgaacgtcatcatcgcctgaacagaatgaagcacatcaa  
 acccaatccacagagtttgagaaaaagaggtgctggacatgctatggcgaacgtatccaagagcgtgaagtgaacgtggtgattcagtgccgct  
 ttactactaaacaaaaacgcttgcattgcagatttgcgatcagataagaagtctctgtgctgcagcggcggatctccacatttgcaggccgtcacact  
 gagagccggaagcagcagcttgaagtgcgcttcagatgtccacatatgcgtcggcagtgctccggctacttctgctcagcctgtgtgttgggaatc  
 ccaaaagtaacctgtacctggcctgcagccccgccgaaggctccgctccacatctctgactcaaggagatcagcgggtctctggagaccattaaagctg  
 gagatccaacggatagaccagctgctgtcttcaggaaggagaccggcagctccataaaccttcagtcgctcaaatgcccgggtgtttatcag  
 caccgctatgaagattcgcagatggtggagatggacaggaagacaccagcgcatttaacttcgagctgcaggataaagtgcgcat

**Fig. S1.** Top: the full plasmid for the CETI-PIC3 line. Bottom: the sequences for the three cytokines with intervening E2A sequences. The sequence for *ifnγ1* is in yellow. The sequence for *tnfa* is in blue followed by the sequence for *il1b* in purple. The intervening E2A sequences are in green.

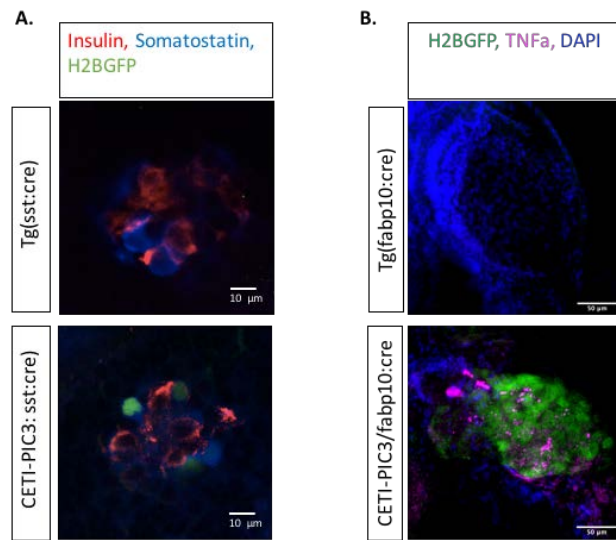

**Fig. S2.** (A) The CETI-PIC3 line was crossed to a *somatostatin-cre* (*Tg(sst:cre)*) line to induce cytokines in a delta cell-specific manner. (B) The CETI-PIC3 line was crossed to a liver-cre line (*fabp10:cre*) to induce cytokines in a hepatocyte-specific manner.

**Table S1.** The primers used in the qRT-PCR analysis.

| Primer Name   | Sequence                 |
|---------------|--------------------------|
| zf_actin_FWD  | CGAGCAGGAGATGGGAACC      |
| Zf_actin_REV  | CAACGGAAACGCTCATTGC      |
| Zf_ifng1_FWD  | GGGCTTTGCCTGGGGAGTAT     |
| Zf_ifng1_REV  | TCAGGATTCGCAGGAAGATGG    |
| ZF_tnfa_FWD   | GCGCTTTTCTGAATCCTACG     |
| ZF_tnfa_REV   | GTGCCCAGTCTGTCTCCTC      |
| ZF_il1b_FWD   | AGGAGACCGGCAGCTCCATA     |
| ZF_il1b_REV   | TGATGCGCTCGGTGTCTTTC     |
| ZF_H2BGFP_FWD | GGTACTAAGGCCGTCACCAA     |
| ZF_H2BGFP_REV | GAACTTCAGGGTCAGCTTGC     |
| Zf_nrf2a_FWD  | TCACTCCCAGAGTTGCAGCAG    |
| ZF_nrf2a_REV  | GTTTGAGCCGAGCCGAGATG     |
| Zf_hmox1a_FWD | GTCAGGGAGCTCACACAGTC     |
| Zf_hmox1a_REV | TTTTTCAGCTCTGACGTGGCT    |
| Zf_gpx1a_FWD  | AGCATGGCAGGAACCATGAA     |
| Zf_gpx1a_REV  | GAAGCCATTTCCAGGACGGA     |
| Zf_sod_FWD    | ACCGGCACCGTCTATTTCAA     |
| Zf_sod_REV    | AGCATGGACGTGGAAACCAT     |
| ZF_nos2a_FWD  | GCCTTGTGCACTCATCTGAA     |
| Zf_nos2a_REV  | CCTGCAGGACTAGTGGAAGC     |
| Zf_bip_FWD    | GGTCGGCGGCTCCACTCGTAT    |
| Zf_bip_REV    | AGCCGGTTCTGGTCGTTGGTAATG |
| Zf_chop_FWD   | GGAGCCCGAGTTTTTGGATGTTTT |
| Zf_chop_REV   | AGTGCGCCGCCTCGTTTTCTT    |
